# Supplementary material for: Characterizing variability in warfarin dose requirements in children using modelling and simulation
Source: PubMed Central journal article supplement — Br J Clin Pharmacol. 2013 Dec 12;78(1):158–69. doi: 10.1111/bcp.12308 (PMC4168390; doi:10.1111/bcp.12308), 2013-12-12

**Supplementary Figure S1** Prediction corrected VPCs for the optimized model applied on data from 163 children but stratified on (A) *CYP2C9* genotype or (B) *CYP4F2* genotype. Figure 1A includes from left to right data from children with *CYP2C9* \*1/\*1 (high enzyme activity), *CYP2C9* \*1/\*2 or \*1/\*3 (intermediate enzyme activity), and *CYP2C9* \*2/\*2, \*2/\*3 or \*3/\*3 (low enzyme activity). The right panel, representing children with rare *CYP2C9* genotypes, include data from only 4 children and results in wide prediction intervals that overlaps. Figure 1B includes from left to right data from children with *CYP4F2* \*1/\*1 (wild-type), *CYP4F2* \*1/\*3 (one variant allele) and *CYP4F2* \*3/\*3 (two variant alleles). There is no systematic bias in the VPCs suggesting that a child with the *CYP4F2* variant allele requires a higher warfarin dose.

A)

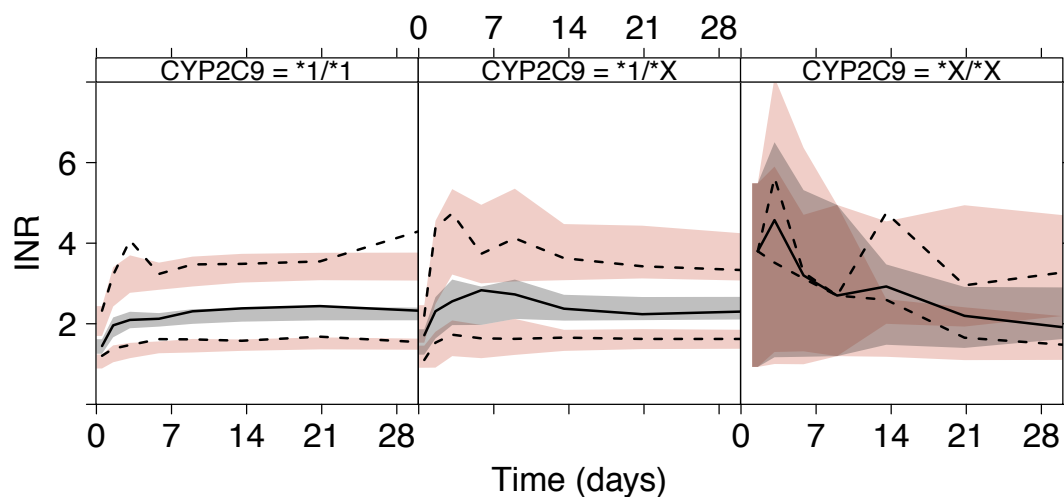

B)

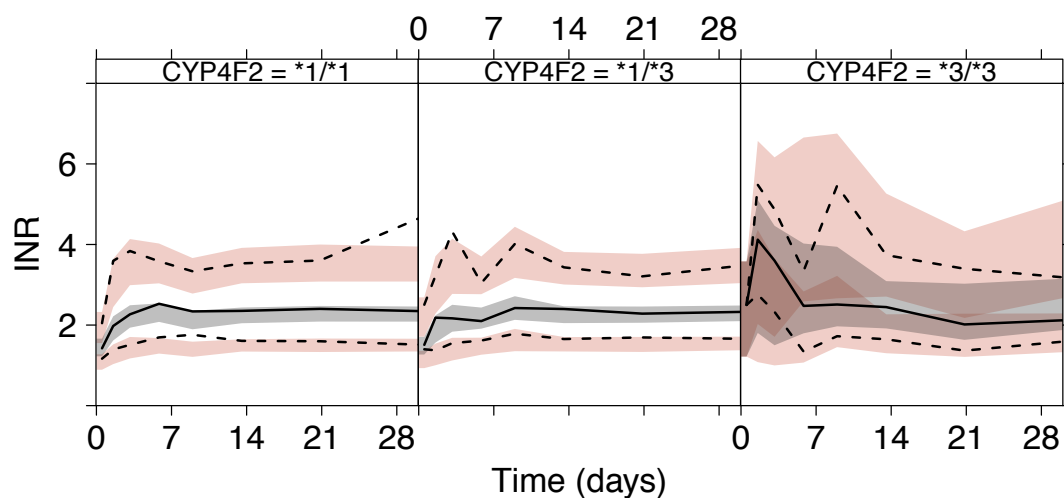

Supplement: bcp0078-0158-SD1.pdf [file bcp0078-0158-SD1.pdf]
