# Supplementary material for: Characterizing variability in warfarin dose requirements in children using modelling and simulation
Source: PubMed Central journal article supplement — Br J Clin Pharmacol. 2013 Dec 12;78(1):158–69. doi: 10.1111/bcp.12308 (PMC4168390; doi:10.1111/bcp.12308), 2013-12-12

**Supplementary Figure S2** Prediction corrected VPCs for the optimized model applied on data from 163 warfarin treated children but using body weight (A) or age (B) as the independent variable (x-axis) instead of time. Solid lines denote the medians of observed data and dashed lines denote the 10<sup>th</sup> and 90<sup>th</sup> percentiles of observed data. Shaded areas represent 95% confidence intervals of simulated medians (grey) and 80% prediction intervals (pink). A model is considered to have good predictive properties if the lines representing the observed data mainly fall inside the simulated prediction intervals.

A)

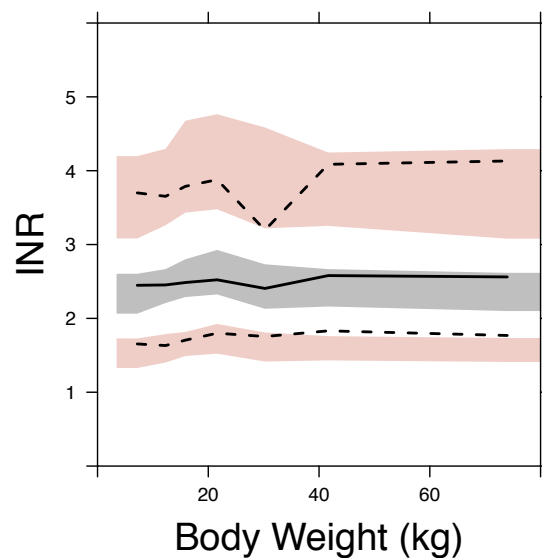

B)

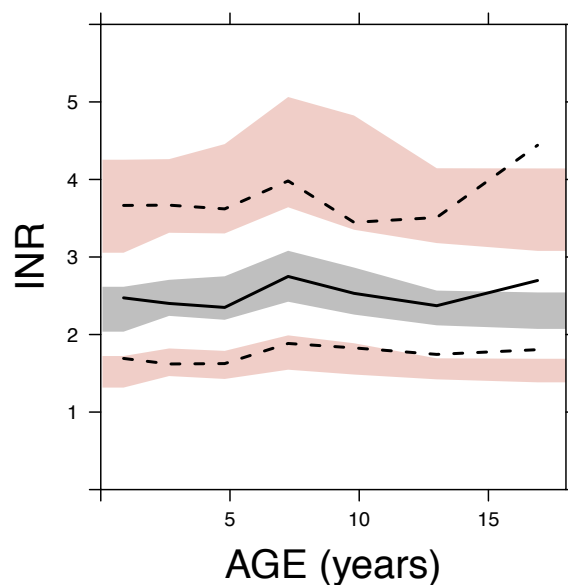

Supplement: bcp0078-0158-SD2.pdf [file bcp0078-0158-SD2.pdf]
